# Supplementary material for: Intramuscular Ricin Poisoning of Mice Leads to Widespread Damage in the Heart, Spleen, and Bone Marrow
Source: Toxins (Basel). 2019 Jun 16;11(6):344. doi: 10.3390/toxins11060344 (PMC6628730; doi:10.3390/toxins11060344)
Supplement: Supplementary file 1 [file toxins-11-00344-s001.pdf]

# Supplementary Materials: Intramuscular Ricin Poisoning of Mice Leads to Widespread Damage in the Heart, Spleen, and Bone Marrow

Anita Sapoznikov, Amir Rosner, Reut Falach, Yoav Gal, Moshe Aftalion, Yentl Evgy, Ofir Israeli <sup>1</sup>, Tamar Sabo and Chanoch Kronman

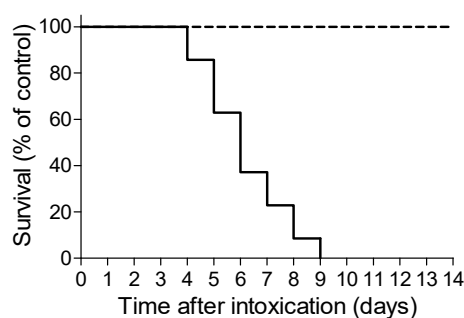

**Figure 1.** Survival curve of mice following intramuscular (i.m.) ricin administration. Mice were injected i.m. with PBS (dashed line, n = 5) or ricin (2LD<sub>50</sub>, 18 µg ricin/kg body weight, solid line, n = 35) and survival was monitored until day 14 following intoxication.

**Table S1.** Biochemical and hematological parameters, which did not change following exposure of mice to ricin.

|                            |                 | Time after exposure (h) |             |             |             |
|----------------------------|-----------------|-------------------------|-------------|-------------|-------------|
|                            |                 | control                 | 24          | 48          | 72          |
| Serum chemistry            | ALB (g/dL)      | 3.3 ± 0.2               | 2.9 ± 0.2   | 1.6 ± 0.85  | 2.35 ± 0.2  |
|                            | TBIL (mg/dL)    | 0.2 ± 0                 | 0.18 ± 0.04 | 0.3 ± 0.1   | 0.93 ± 0.95 |
|                            | CRE (mg/dL)     | 0.28 ± 0.13             | 0.24 ± 0.1  | 0.63 ± 0.21 | 0.6 ± 0.2   |
|                            | TP (g/dL)       | 4.4 ± 0.2               | 4.2 ± 0.15  | 4.3 ± 2.6   | 4.7 ± 1.3   |
|                            | GLOB (g/dL)     | 1 ± 0.13                | 1.28 ± 0.13 | 1.4 ± 0.5   | 1.4 ± 1.27  |
| Blood count                | LY (K/µl)       | 2.41 ± 0.9              | 1.77 ± 0.5  | 1.56 ± 0.56 | 2.96 ± 1.27 |
|                            | MO (K/µl)       | 0.09 ± 0.04             | 0.07 ± 0.02 | 0.09 ± 0.04 | 0.09 ± 0.09 |
|                            | EO(K/µl)        | 0.04 ± 0.03             | 0.08 ± 0.07 | 0.12 ± 0.05 | 0.12 ± 0.1  |
|                            | BA (K/µl)       | 0.01 ± 0.01             | 0.03 ± 0.03 | 0.02 ± 0.01 | 0.02 ± 0.02 |
|                            | HCT (%)         | 43.6 ± 3.38             | 48.8 ± 1.84 | 50.8 ± 5.69 | 51.7 ± 4.28 |
|                            | RBC (M/µl)      | 8.6 ± 0.35              | 8.9 ± 0.25  | 10 ± 0.53   | 10 ± 0.58   |
|                            | Hb (g/dL)       | 13.7 ± 0.62             | 14.3 ± 0.65 | 16.5 ± 1.3  | 17 ± 0.55   |
|                            | MCV (fL)        | 50.5 ± 2.9              | 54.7 ± 3.1  | 50.3 ± 3.6  | 50 ± 2.8    |
|                            | MCH (pg)        | 15.9 ± 0.63             | 16.1 ± 0.52 | 16.4 ± 0.67 | 16.4 ± 0.44 |
|                            | MCHC (g/dL)     | 31.5 ± 1.84             | 29.5 ± 2.2  | 32.7 ± 2    | 33 ± 1.8    |
|                            | MPV (fL)        | 6.6 ± 0.8               | 7.5 ± 1.2   | 8.2 ± 1.3   | 10.3 ± 0.6  |
|                            | PDW (%)         | 44 ± 1.8                | 43.9 ± 2    | 54 ± 6.7    | 45.6 ± 5.4  |
| Coagulation                | D-Dimer (ng/ml) | <400                    | <400        | <400        | <400        |
| Pro-inflammatory cytokines | TGF-β1 (pg/ml)  | ND                      | ND          | ND          | ND          |

Serum chemistry, blood cell counts, coagulation factors and pro-inflammatory cytokines were determined in peripheral blood samples collected from mice immediately before (= control) or at the indicated time points after i.m. exposure to ricin at a dose of 2LD<sub>50</sub> (18 µg ricin/kg body weight). ND, not detected. Data represent mean ± STD; *n* = 4-5 (serum chemistry), *n* = 3 (blood cell counts), *n* = 5-20 (coagulation), *n* = 5-10 (cytokines).
